# Supplementary material for: Body burdens, sources and interrelations of selected toxic and essential elements among the nine Cree First Nations of Eeyou Istchee, James Bay region of northern Quebec, Canada
Source: Royal Society of Chemistry journal article supplement (doi:10.1039/c7em00052a), 2017-01-01
Supplement: c7em00052a1.pdf [file c7em00052a1.pdf]

**Table S1. Summary Statistics for the Observed Concentrations of 10 Elements in Whole Blood for the *Eyou Istchee* Communities (Age ≥ 8 y; both sexes; n = 1066)**

|                         | Community <sup>a</sup> | n   | Median | Geo. Mean | Mean   | S.E. of Mean | Min  | Max    |
|-------------------------|------------------------|-----|--------|-----------|--------|--------------|------|--------|
| <b>Cadmium (nmol/L)</b> | C                      | 229 | 5.250  | 6.584     | 15.446 | 1.205        | 0.20 | 77.40  |
|                         | E                      | 170 | 5.600  | 5.796     | 10.862 | 0.921        | 0.20 | 64.00  |
|                         | D                      | 134 | 7.850  | 6.746     | 14.320 | 1.345        | 0.20 | 65.00  |
|                         | G                      | 140 | 4.350  | 5.891     | 12.893 | 1.244        | 0.20 | 59.00  |
|                         | F                      | 221 | 7.500  | 6.830     | 13.377 | 0.930        | 0.20 | 73.00  |
|                         | I                      | 135 | 10.000 | 7.990     | 13.181 | 0.963        | 0.60 | 50.00  |
|                         | H                      | 128 | 4.350  | 5.064     | 9.556  | 0.986        | 0.20 | 65.00  |
|                         | A                      | 190 | 12.005 | 12.946    | 18.902 | 1.163        | 2.67 | 77.39  |
|                         | B                      | 82  | 19.125 | 14.649    | 23.065 | 2.110        | 1.78 | 83.62  |
| <b>Mercury (nmol/L)</b> | C                      | 229 | 21.440 | 21.325    | 48.668 | 4.774        | 0.25 | 498.53 |
|                         | E                      | 170 | 11.000 | 10.094    | 32.296 | 4.315        | 0.25 | 410.00 |
|                         | D                      | 134 | 7.350  | 6.683     | 19.199 | 2.775        | 0.25 | 200.00 |
|                         | G                      | 140 | 7.800  | 7.296     | 19.827 | 2.466        | 0.25 | 190.00 |
|                         | F                      | 221 | 11.000 | 9.547     | 25.452 | 2.937        | 0.25 | 300.00 |
|                         | I                      | 135 | 17.000 | 17.857    | 49.336 | 7.106        | 0.30 | 630.00 |
|                         | H                      | 128 | 13.500 | 13.614    | 41.636 | 7.323        | 0.30 | 650.00 |
|                         | A                      | 190 | 19.941 | 20.657    | 37.721 | 3.506        | 0.70 | 374.89 |
|                         | B                      | 82  | 10.469 | 12.052    | 31.389 | 7.541        | 0.70 | 538.41 |
| <b>Lead (µmol/L)</b>    | C                      | 229 | 0.082  | 0.091     | 0.126  | 0.008        | 0.02 | 0.68   |
|                         | E                      | 170 | 0.110  | 0.126     | 0.210  | 0.018        | 0.02 | 1.80   |
|                         | D                      | 134 | 0.086  | 0.096     | 0.142  | 0.013        | 0.02 | 0.99   |

|                   | Community <sup>a</sup> | n     | Median | Geo. Mean | Mean  | S.E. of Mean | Min  | Max    |
|-------------------|------------------------|-------|--------|-----------|-------|--------------|------|--------|
|                   | G                      | 140   | 0.120  | 0.124     | 0.183 | 0.015        | 0.02 | 1.00   |
|                   | F                      | 221   | 0.150  | 0.156     | 0.244 | 0.017        | 0.02 | 1.60   |
|                   | I                      | 135   | 0.250  | 0.262     | 0.420 | 0.038        | 0.03 | 2.50   |
|                   | H                      | 128   | 0.050  | 0.060     | 0.082 | 0.007        | 0.02 | 0.46   |
|                   | A                      | 190   | 0.097  | 0.106     | 0.152 | 0.012        | 0.02 | 1.59   |
|                   | B                      | 82    | 0.082  | 0.094     | 0.137 | 0.016        | 0.02 | 0.77   |
| Selenium (μmol/L) | C                      | 229   | 2.030  | 2.143     | 2.183 | 0.031        | 1.39 | 4.94   |
|                   | E                      | 170   | 2.150  | 2.179     | 2.195 | 0.022        | 1.70 | 3.70   |
|                   | D                      | 134   | 2.100  | 2.118     | 2.132 | 0.022        | 1.70 | 3.10   |
|                   | G                      | 140   | 2.000  | 2.036     | 2.046 | 0.018        | 1.50 | 2.80   |
|                   | F                      | 221   | 2.100  | 2.107     | 2.124 | 0.019        | 1.30 | 4.20   |
|                   | I                      | 135   | 2.100  | 2.083     | 2.097 | 0.021        | 1.60 | 2.90   |
|                   | H                      | 128   | 2.200  | 2.258     | 2.295 | 0.040        | 1.80 | 4.90   |
|                   | A                      | 190   | 2.546  | 2.551     | 2.572 | 0.024        | 1.74 | 4.19   |
| B                 | 82                     | 2.292 | 2.271  | 2.296     | 0.038 | 1.36         | 3.34 |        |
| Cobalt (nmol/L)   | E                      | 170   | 1.800  | 1.964     | 2.514 | 0.223        | 0.47 | 33.00  |
|                   | D                      | 134   | 3.400  | 3.592     | 3.811 | 0.136        | 2.00 | 15.00  |
|                   | G                      | 140   | 3.150  | 3.303     | 3.615 | 0.154        | 2.00 | 13.00  |
|                   | F                      | 221   | 4.000  | 4.195     | 4.442 | 0.113        | 2.00 | 13.00  |
|                   | I                      | 135   | 4.500  | 4.617     | 4.759 | 0.113        | 3.10 | 12.00  |
|                   | H                      | 128   | 4.600  | 5.002     | 6.715 | 1.761        | 3.70 | 230.00 |
|                   | A                      | 190   | 2.400  | 3.182     | 3.490 | 0.130        | 2.40 | 13.58  |
|                   | B                      | 82    | 2.400  | 2.835     | 3.039 | 0.163        | 2.40 | 10.18  |

|                     | Community <sup>a</sup> | n   | Median | Geo. Mean | Mean   | S.E. of Mean | Min   | Max    |
|---------------------|------------------------|-----|--------|-----------|--------|--------------|-------|--------|
| Copper (μmol/L)     | E                      | 170 | 16.000 | 15.640    | 15.820 | 0.188        | 10.00 | 27.00  |
|                     | D                      | 134 | 16.000 | 16.150    | 16.360 | 0.236        | 11.00 | 27.00  |
|                     | G                      | 140 | 14.000 | 14.690    | 14.840 | 0.183        | 10.00 | 25.00  |
|                     | F                      | 221 | 14.000 | 14.290    | 14.400 | 0.120        | 10.00 | 22.00  |
|                     | I                      | 135 | 15.000 | 15.520    | 15.670 | 0.192        | 11.00 | 24.00  |
|                     | H                      | 128 | 15.000 | 15.520    | 15.650 | 0.183        | 12.00 | 24.00  |
|                     | A                      | 190 | 15.150 | 15.500    | 15.730 | 0.212        | 10.00 | 31.00  |
|                     | B                      | 82  | 15.890 | 16.020    | 16.220 | 0.296        | 9.00  | 27.00  |
| Molybdenum (nmol/L) | E                      | 170 | 5.600  | 5.791     | 6.182  | 0.195        | 2.40  | 26.00  |
|                     | D                      | 134 | 5.450  | 5.638     | 6.158  | 0.282        | 2.50  | 26.00  |
|                     | G                      | 140 | 7.550  | 7.548     | 8.201  | 0.289        | 2.00  | 23.00  |
|                     | F                      | 221 | 5.300  | 5.142     | 5.665  | 0.169        | 0.50  | 21.00  |
|                     | I                      | 135 | 4.900  | 4.806     | 5.204  | 0.191        | 1.00  | 17.00  |
|                     | H                      | 128 | 5.850  | 5.971     | 6.485  | 0.249        | 2.00  | 19.00  |
|                     | A                      | 190 | 18.762 | 18.343    | 18.784 | 0.303        | 10.40 | 37.50  |
|                     | B                      | 82  | 14.593 | 14.286    | 14.847 | 0.462        | 8.30  | 27.10  |
| Nickel (nmol/L)     | E                      | 170 | 20.500 | 21.665    | 24.298 | 1.150        | 7.80  | 110.00 |
|                     | D                      | 134 | 25.000 | 25.102    | 25.590 | 0.544        | 19.00 | 79.00  |
|                     | G                      | 140 | 23.000 | 19.573    | 21.366 | 0.625        | 3.00  | 37.00  |
|                     | F                      | 221 | 22.000 | 22.642    | 22.968 | 0.272        | 14.00 | 46.00  |
|                     | I                      | 135 | 8.000  | 6.938     | 7.704  | 0.265        | 2.50  | 20.00  |
|                     | H                      | 128 | 7.000  | 6.897     | 8.098  | 0.518        | 2.50  | 49.00  |
|                     | A                      | 190 | 13.630 | 12.494    | 13.575 | 0.422        | 7.20  | 40.90  |

|               | Community <sup>a</sup> | n   | Median | Geo. Mean | Mean   | S.E. of Mean | Min   | Max    |
|---------------|------------------------|-----|--------|-----------|--------|--------------|-------|--------|
|               | B                      | 82  | 7.229  | 8.714     | 9.202  | 0.426        | 7.20  | 30.70  |
| Zinc (μmol/L) | E                      | 170 | 96.000 | 94.330    | 95.212 | 0.997        | 65.00 | 130.00 |
|               | D                      | 134 | 92.000 | 91.922    | 92.701 | 1.068        | 66.00 | 150.00 |
|               | G                      | 140 | 91.500 | 90.621    | 91.693 | 1.185        | 63.00 | 130.00 |
|               | F                      | 221 | 96.000 | 93.302    | 94.231 | 0.863        | 46.00 | 130.00 |
|               | I                      | 135 | 92.000 | 89.586    | 90.830 | 1.264        | 54.00 | 120.00 |
|               | H                      | 128 | 96.000 | 93.632    | 94.906 | 1.378        | 60.00 | 150.00 |
|               | A                      | 190 | 93.282 | 91.476    | 92.539 | 0.993        | 54.66 | 130.90 |
|               | B                      | 82  | 85.936 | 85.234    | 86.362 | 1.540        | 56.86 | 127.90 |

<sup>a</sup>The essential metals, cobalt and arsenic in blood, and As in hair and urine were not measured in C. For this reason, the results for this community are not included in the PCA and CA analyses.

**Table S2. Summary Statistics for Hair, Urine and Nail Concentrations of Selected Elements in the *Eeyou Istchee* Communities (Age ≥ 8 y; both sexes)**

|                                                     | Community Code | n   | Median | Geometric Mean | Mean  | Std. Error of Mean | Minimum | Maximum |
|-----------------------------------------------------|----------------|-----|--------|----------------|-------|--------------------|---------|---------|
| Hair analysis: Hg (nmol/g)                          | A              | 218 | 4.490  | 4.553          | 9.960 | 0.890              | 0.700   | 69.300  |
|                                                     | B              | 97  | 1.990  | 2.212          | 4.752 | 0.739              | 0.700   | 43.870  |
|                                                     | C              | 273 | 3.300  | 2.765          | 8.276 | 0.822              | 0.250   | 101.000 |
|                                                     | D              | 136 | 0.771  | 1.072          | 3.580 | 0.569              | 0.250   | 36.987  |
|                                                     | E              | 188 | 0.974  | 1.283          | 5.071 | 0.802              | 0.250   | 68.584  |
|                                                     | F              | 248 | 0.975  | 1.035          | 3.263 | 0.485              | 0.100   | 80.000  |
|                                                     | G              | 156 | 0.500  | 0.603          | 1.591 | 0.247              | 0.100   | 25.000  |
|                                                     | H              | 153 | 2.400  | 2.165          | 7.799 | 1.263              | 0.100   | 98.000  |
|                                                     | I              | 151 | 2.800  | 2.930          | 9.091 | 1.670              | 0.100   | 210.000 |
| Hair analysis: As (µg/g)<br>(1 µg/g = 13.35 nmol/g) | A              | 180 | 0.045  | 0.049          | 0.115 | 0.015              | 0.010   | 1.480   |
|                                                     | B              | 78  | 0.050  | 0.039          | 0.058 | 0.006              | 0.010   | 0.260   |
|                                                     | C              | 0   | .      | .              | .     | .                  | .       | .       |
|                                                     | D              | 121 | 0.031  | 0.033          | 0.044 | 0.003              | 0.010   | 0.220   |
|                                                     | E              | 146 | 0.033  | 0.037          | 0.055 | 0.006              | 0.010   | 0.440   |
|                                                     | F              | 190 | 0.038  | 0.041          | 0.058 | 0.005              | 0.010   | 0.810   |
|                                                     | G              | 117 | 0.031  | 0.034          | 0.043 | 0.003              | 0.010   | 0.220   |
|                                                     | H              | 122 | 0.051  | 0.048          | 0.066 | 0.005              | 0.010   | 0.380   |
|                                                     | I              | 126 | 0.020  | 0.043          | 0.622 | 0.194              | 0.010   | 15.000  |
| Urine analysis: Inorganic As (µmol/L)               | A              | 185 | 0.050  | 0.068          | 0.079 | 0.004              | 0.050   | 0.390   |
|                                                     | B              | 81  | 0.050  | 0.080          | 0.099 | 0.009              | 0.050   | 0.408   |
|                                                     | C              | 0   | .      | .              | .     | .                  | .       | .       |
|                                                     | D              | 134 | 0.050  | 0.058          | 0.065 | 0.004              | 0.050   | 0.310   |
|                                                     | E              | 171 | 0.050  | 0.064          | 0.077 | 0.005              | 0.050   | 0.470   |

|                                                                                   | Community Code | n   | Median | Geometric Mean | Mean  | Std. Error of Mean | Minimum | Maximum |
|-----------------------------------------------------------------------------------|----------------|-----|--------|----------------|-------|--------------------|---------|---------|
|                                                                                   | F              | 219 | 0.050  | 0.066          | 0.083 | 0.005              | 0.050   | 0.570   |
|                                                                                   | G              | 136 | 0.050  | 0.055          | 0.062 | 0.005              | 0.050   | 0.620   |
|                                                                                   | H              | 127 | 0.050  | 0.059          | 0.071 | 0.008              | 0.050   | 0.980   |
|                                                                                   | I              | 132 | 0.050  | 0.056          | 0.060 | 0.003              | 0.050   | 0.310   |
| Urine analysis: I ( $\mu\text{mol/L}$ )                                           | A              | 0   | .      | .              | .     | .                  | .       | .       |
|                                                                                   | B              | 0   | .      | .              | .     | .                  | .       | .       |
|                                                                                   | C              | 0   | .      | .              | .     | .                  | .       | .       |
|                                                                                   | D              | 134 | 1.050  | 0.964          | 1.226 | 0.075              | 0.120   | 4.500   |
|                                                                                   | E              | 170 | 0.900  | 0.914          | 1.124 | 0.057              | 0.140   | 3.800   |
|                                                                                   | F              | 184 | 0.845  | 0.795          | 0.988 | 0.052              | 0.050   | 6.900   |
|                                                                                   | G              | 107 | 0.850  | 0.875          | 1.180 | 0.099              | 0.100   | 4.900   |
|                                                                                   | H              | 102 | 0.860  | 0.800          | 1.055 | 0.086              | 0.050   | 6.100   |
|                                                                                   | I              | 107 | 0.950  | 0.843          | 0.995 | 0.053              | 0.150   | 2.800   |
| Urine analysis: Inorganic As [ $\mu\text{mol/L}$ ]/Creatinine [ $\text{mmol/L}$ ] | A              | 185 | 0.063  | 0.067          | 0.087 | 0.006              | 0.014   | 0.714   |
|                                                                                   | B              | 81  | 0.078  | 0.072          | 0.086 | 0.006              | 0.016   | 0.250   |
|                                                                                   | C              | 0   | .      | .              | .     | .                  | .       | .       |
|                                                                                   | D              | 134 | 0.007  | 0.007          | 0.011 | 0.001              | 0.002   | 0.083   |
|                                                                                   | E              | 170 | 0.007  | 0.008          | 0.010 | 0.001              | 0.002   | 0.058   |
|                                                                                   | F              | 219 | 0.008  | 0.008          | 0.011 | 0.001              | 0.001   | 0.089   |
|                                                                                   | G              | 136 | 0.006  | 0.006          | 0.009 | 0.001              | 0.001   | 0.086   |
|                                                                                   | H              | 127 | 0.007  | 0.007          | 0.009 | 0.001              | 0.002   | 0.054   |
|                                                                                   | I              | 132 | 0.006  | 0.008          | 0.012 | 0.001              | 0.002   | 0.085   |
| Urine analysis: I [ $\mu\text{mol/L}$ ]/Creatinine [ $\text{mmol/L}$ ]            | A              | 0   | .      | .              | .     | .                  | .       | .       |
|                                                                                   | B              | 0   | .      | .              | .     | .                  | .       | .       |

| Community Code | n   | Median | Geometric Mean | Mean  | Std. Error of Mean | Minimum | Maximum |
|----------------|-----|--------|----------------|-------|--------------------|---------|---------|
| C              | 0   | .      | .              | .     | .                  | .       | .       |
| D              | 134 | 0.127  | 0.123          | 0.150 | 0.010              | 0.030   | 0.975   |
| E              | 170 | 0.108  | 0.109          | 0.132 | 0.007              | 0.023   | 0.766   |
| F              | 184 | 0.092  | 0.094          | 0.117 | 0.010              | 0.023   | 1.354   |
| G              | 107 | 0.092  | 0.097          | 0.117 | 0.008              | 0.026   | 0.465   |

**Table S3. Correlations of CA and PCA Loadings with Concentrations of the Study Elements (in log units) in Whole Blood, and/or in Urine or Hair**

|                                               | Pearson Correlation and significance test <sup>1</sup> | Hair analysis : Hg [nmol/g] | Hair analysis : As [µg/g] | Blood analysis : Cd [nmol/L] | Blood analysis : Hg [nmol/L] | Blood analysis : Pb [µmol/L] | Blood analysis : Se [µmol/L] | Blood analysis : Co [nmol/L] | Blood analysis : Cu [µmol/L] | Blood analysis : Mo [nmol/L] | Blood analysis : Ni [nmol/L] | Blood analysis : Zn [µmol/L] | Urine analysis: Inorganic As [µmol/L]/Creatinine [mmol/L] |
|-----------------------------------------------|--------------------------------------------------------|-----------------------------|---------------------------|------------------------------|------------------------------|------------------------------|------------------------------|------------------------------|------------------------------|------------------------------|------------------------------|------------------------------|-----------------------------------------------------------|
| Hair, Blood, Urine (12 Elements) CA-1 (44.3%) | Pearson r                                              | <u>-0.949</u>               | -0.181                    | 0.180                        | <u>-0.942</u>                | -0.491                       | -0.389                       | 0.061                        | 0.026                        | -0.032                       | 0.301                        | -0.232                       | -0.154                                                    |
|                                               | p-value                                                | 0.000                       | 0.000                     | 0.000                        | 0.000                        | 0.000                        | 0.000                        | 0.046                        | 0.405                        | 0.292                        | 0.000                        | 0.000                        | 0.000                                                     |
| Hair, Blood, Urine (12 Elements) CA-2 (19.6%) | Pearson r                                              | -0.067                      | <b>0.974</b>              | 0.026                        | -0.092                       | 0.024                        | -0.016                       | 0.017                        | -0.043                       | 0.024                        | -0.104                       | -0.087                       | -0.016                                                    |
|                                               | p-value                                                | 0.029                       | 0.000                     | 0.389                        | 0.003                        | 0.443                        | 0.599                        | 0.577                        | 0.160                        | 0.433                        | 0.001                        | 0.005                        | 0.596                                                     |
| Hair, Blood, Urine (12 Elements) CA-3 (13.5%) | Pearson r                                              | -0.145                      | 0.005                     | <u>-0.958</u>                | -0.062                       | -0.124                       | -0.143                       | -0.061                       | 0.004                        | -0.086                       | 0.244                        | -0.111                       | -0.237                                                    |
|                                               | p-value                                                | 0.000                       | 0.858                     | 0.000                        | 0.043                        | 0.000                        | 0.000                        | 0.045                        | 0.904                        | 0.005                        | 0.000                        | 0.000                        | 0.000                                                     |
| Hair, Blood, Urine (12 Elements) CA-4 (7.6%)  | Pearson r                                              | -0.101                      | 0.003                     | 0.053                        | 0.083                        | <b>0.598</b>                 | -0.258                       | 0.071                        | -0.105                       | <u>-0.789</u>                | 0.332                        | 0.206                        | <b>-0.548</b>                                             |
|                                               | p-value                                                | 0.001                       | 0.912                     | 0.086                        | 0.007                        | 0.000                        | 0.000                        | 0.020                        | 0.001                        | 0.000                        | 0.000                        | 0.000                        | 0.000                                                     |
| Hair, Blood, Urine (12 Elements) CA-5 (4.2%)  | Pearson r                                              | 0.059                       | 0.032                     | 0.111                        | 0.093                        | -0.447                       | 0.037                        | -0.389                       | -0.112                       | -0.163                       | <b>0.587</b>                 | 0.135                        | -0.155                                                    |
|                                               | p-value                                                | 0.055                       | 0.293                     | 0.000                        | 0.002                        | 0.000                        | 0.227                        | 0.000                        | 0.000                        | 0.000                        | 0.000                        | 0.000                        | 0.000                                                     |
| Hair, Blood, Urine (12 Elements) CA-6 (3.8%)  | Pearson r                                              | -0.043                      | 0.004                     | 0.030                        | 0.055                        | 0.356                        | 0.070                        | <b>-0.628</b>                | -0.092                       | 0.392                        | 0.271                        | -0.003                       | 0.310                                                     |
|                                               | p-value                                                | 0.162                       | 0.898                     | 0.333                        | 0.071                        | 0.000                        | 0.023                        | 0.000                        | 0.003                        | 0.000                        | 0.000                        | 0.913                        | 0.000                                                     |
| PC-1 of Metals in Hair, Blood, Urine (23.4%)  | Pearson r                                              | <b>0.884</b>                | 0.171                     | 0.111                        | <b>0.838</b>                 | 0.486                        | <b>0.690</b>                 | -0.028                       | -0.015                       | 0.306                        | -0.308                       | 0.399                        | 0.374                                                     |
|                                               | p-value                                                | 0.000                       | 0.000                     | 0.000                        | 0.000                        | 0.000                        | 0.000                        | 0.361                        | 0.627                        | 0.000                        | 0.000                        | 0.000                        | 0.000                                                     |
| PC-2 of Metals in Hair, Blood, Urine (15.8%)  | Pearson r                                              | -0.176                      | -0.076                    | 0.212                        | -0.281                       | <b>-0.517</b>                | 0.199                        | -0.065                       | 0.194                        | <b>0.820</b>                 | -0.088                       | -0.350                       | <b>0.614</b>                                              |
|                                               | p-value                                                | 0.000                       | 0.013                     | 0.000                        | 0.000                        | 0.000                        | 0.000                        | 0.034                        | 0.000                        | 0.000                        | 0.004                        | 0.000                        | 0.000                                                     |
| PC-3 of Metals in Hair, Blood, Urine (10.6%)  | Pearson r                                              | -0.119                      | -0.339                    | 0.142                        | -0.077                       | -0.138                       | 0.282                        | -0.332                       | -0.388                       | 0.023                        | <b>0.601</b>                 | <b>0.558</b>                 | -0.057                                                    |
|                                               | p-value                                                | 0.000                       | 0.000                     | 0.000                        | 0.012                        | 0.000                        | 0.000                        | 0.000                        | 0.000                        | 0.448                        | 0.000                        | 0.000                        | 0.063                                                     |
| PC-4 of Metals in Hair, Blood, Urine (9.4%)   | Pearson r                                              | -0.129                      | -0.180                    | <b>0.698</b>                 | -0.177                       | 0.011                        | 0.142                        | <b>0.501</b>                 | 0.246                        | -0.088                       | -0.055                       | 0.288                        | 0.008                                                     |
|                                               | p-value                                                | 0.000                       | 0.000                     | 0.000                        | 0.000                        | 0.712                        | 0.000                        | 0.000                        | 0.000                        | 0.004                        | 0.073                        | 0.000                        | 0.793                                                     |
| PC-5 of Metals in Hair, Blood, Urine (8.5%)   | Pearson r                                              | -0.125                      | <b>0.701</b>              | 0.316                        | -0.146                       | 0.025                        | -0.012                       | 0.006                        | <b>-0.617</b>                | 0.067                        | -0.093                       | -0.009                       | 0.003                                                     |
|                                               | p-value                                                | 0.000                       | 0.000                     | 0.000                        | 0.000                        | 0.418                        | 0.702                        | 0.853                        | 0.000                        | 0.030                        | 0.002                        | 0.775                        | 0.925                                                     |

Note: large negative correlations are indicated by underlining of value; large positive (shaded blue), robust positive, and robust negative correlations are indicated by **bold-face type**. Element concentrations Log10 transformed before calculation of correlations. <sup>1</sup> Pearson Correlation with 2-tailed test.
